# Supplementary material for: The Dynamics of Addiction: Craving versus Self-Control
Source: PLoS One. 2016 Jun 28;11(6):e0158323. doi: 10.1371/journal.pone.0158323 (PMC4924855; doi:10.1371/journal.pone.0158323)
Supplement: S1 Program — (XLSX) [file pone.0158323.s001.xlsx]

## Sheet: Sheet1
t	C (5a)	S (5b)	E (5c)	V (1)		A (4)	A>q?	p	q=	0.8	t	labda (5d)	R
0	0.6667	-0.3333	0	1		0.8	0.8	0.8	b=	0.5	0	0.25	0
1	0.66668	0	0	0.66668		0.676201	0.676201	0.8			1	0.25	1
2	0.64604	0.0976137	0	0.548426		0.438741	0.438741	0.8			2	0.25	0
3	0.59448	0.18063	0	0.413851		0.473938	0.473938	0.8	d=	0.2	3	0.25	1
4	0.57168	0.198745	0	0.372934		0.441204	0.441204	0.8			4	0.25	1
5	0.551832	0.215112	0	0.33672		0.269376	0.269376	0.8	h=	0.2	5	0.25	0
6	0.501829	0.265312	0	0.236517		0.189213	0.189213	0.8	k=	0.25	6	0.25	0
7	0.448593	0.305393	0	0.1432		0.11456	0.11456	0.8	S+=	0.5	7	0.25	0
8	0.390459	0.264877	0	0.125582		0.243323	0.243323	0.4			8	0.5	1
9	0.386525	0.220004	0	0.166521		0.276074	0.276074	0.4	First load the Analysis Toolpak,		9	0.5	1
10	0.393902	0.185679	0	0.208223		0.309436	0.309436	0.4	see Help> Data Analysis.		10	0.5	1
11	0.408896	0.155268	0	0.253628		0.345759	0.345759	0.4			11	0.5	1
12	0.429307	0.124942	0	0.304365		0.243492	0.243492	0.4			12	0.5	0
13	0.412925	0.128231	0	0.284694		0.227755	0.227755	0.4	First row: varables and parameters		13	0.5	0
14	0.397195	0.137415	0	0.25978		0.207824	0.207824	0.4	with number of formula in article.		14	0.5	0
15	0.380394	0.151054	0	0.22934		0.326329	0.326329	0.4			15	0.5	1
16	0.405413	0.132971	0	0.272442		0.217954	0.217954	0.4			16	0.5	0
17	0.389127	0.144212	0	0.244915		0.338789	0.338789	0.4	For generating random number:		17	0.5	1
18	0.41478	0.124004	0	0.290776		0.23262	0.23262	0.4	Data > Data Analysis>		18	0.5	0
19	0.399891	0.133292	0	0.266599		0.21328	0.21328	0.4	Random number generator>		19	0.5	0
20	0.383908	0.146677	0	0.237231		0.189785	0.189785	0.4	Poisson> labda		20	0.5	0
21	0.365589	0.163778	0	0.201811		0.304306	0.304306	0.4			21	0.5	1
22	0.388999	0.149073	0	0.239926		0.191941	0.191941	0.4			22	0.5	0
23	0.369837	0.163659	0	0.206179		0.3078	0.3078	0.4			23	0.5	1
24	0.392852	0.147278	0	0.245574		0.196459	0.196459	0.4			24	0.5	0
25	0.373921	0.160681	0	0.21324		0.170592	0.170592	0.4			25	0.5	0
26	0.352539	0.178977	0	0.173563		0.13885	0.13885	0.4			26	0.5	0
27	0.326981	0.202166	0	0.124816		0.0998526	0.0998526	0.4			27	0.5	0
28	0.295186	0.23094	0	0.0642464		0.194254	0.194254	0.4			28	0.5	1
29	0.304606	0.230963	0	0.0736425		0.201771	0.201771	0.4			29	0.5	1
30	0.31384	0.227214	0	0.0866258		0.0693007	0.0693007	0.4			30	0.5	0
31	0.274847	0.256235	0	0.0186122		0.0148898	0.0148898	0.4			31	0.5	0
32	0.225277	0.295049	0	0		0.428571	0.428571	0.4			32	0.5	3
33	0.346233	0.224831	0	0.121402		0.0971217	0.0971217	0.4			33	0.5	0
34	0.308734	0.241372	0	0.0673626		0.0538901	0.0538901	0.4			34	0.5	0
35	0.265614	0.269604	0	0		0.285714	0.285714	0.4			35	0.5	2
36	0.317403	0.237211	0	0.0801923		0.207011	0.207011	0.4			36	0.5	1
37	0.324575	0.227093	0	0.0974819		0.0779856	0.0779856	0.4			37	0.5	0
38	0.285997	0.251844	0	0.0341523		0.0273218	0.0273218	0.4			38	0.5	0
39	0.238551	0.287077	0	0		0.142857	0.142857	0.4			39	0.5	1
40	0.24523	0.288822	0	0		0	0	0.4			40	0.5	0
41	0.196184	0.324247	0	0		0	0	0.4			41	0.5	0
42	0.156947	0.355311	0	0		0	0	0.4			42	0.5	0
43	0.125558	0.381797	0	0		0.142857	0.142857	0.4			43	0.5	1
44	0.162906	0.368253	0	0		0	0	0.4			44	0.5	0
45	0.130325	0.38837	0	0		0.142857	0.142857	0.4			45	0.5	1
46	0.16638	0.371243	0	0		0	0	0.4			46	0.5	0
47	0.133104	0.38947	0	0		0	0	0.4			47	0.5	0
48	0.106483	0.407061	0	0		0	0	0.4			48	0.5	0
49	0.0851864	0.42294	0	0		0.142857	0.142857	0.4			49	0.5	1
50	0.133493	0.401012	0	0		0	0	0.4			50	0.5	0
51	0.106794	0.413909	0	0		0	0	0.4			51	0.5	0
52	0.0854355	0.426986	0	0		0.142857	0.142857	0.4			52	0.5	1
53	0.133674	0.40339	0	0		0	0	0.4			53	0.5	0
54	0.10694	0.415299	0	0		0	0	0.4			54	0.5	0
55	0.0855516	0.427792	0	0		0.142857	0.142857	0.4			55	0.5	1
56	0.133759	0.40385	0	0		0.142857	0.142857	0.4			56	0.5	1
57	0.168882	0.379844	0	0		0	0	0.4			57	0.5	0
58	0.135105	0.39413	0	0		0	0	0.4			58	0.5	0
59	0.108084	0.409457	0	0		0	0	0.4			59	0.5	0
60	0.0864674	0.424057	0	0		0	0	0.4			60	0.5	0
61	0.0691739	0.437141	0	0		0	0	0.4			61	0.5	0
62	0.0553391	0.44845	0	0		0.142857	0.142857	0.4			62	0.5	1
63	0.111747	0.422288	0	0		0.428571	0.428571	0.4			63	0.5	3
64	0.279738	0.32388	0	0		0	0	0.4			64	0.5	0
65	0.22379	0.338381	0	0		0.142857	0.142857	0.4			65	0.5	1
66	0.234476	0.322556	0	0		0	0	0.4			66	0.5	0
67	0.18758	0.346639	0	0		0	0	0.4			67	0.5	0
68	0.150064	0.370467	0	0		0	0	0.4			68	0.5	0
69	0.120052	0.392267	0	0		0.142857	0.142857	0.4			69	0.5	1
70	0.158895	0.375636	0	0		0.142857	0.142857	0.4			70	0.5	1
71	0.187195	0.357888	0	0		0	0	0.4			71	0.5	0
72	0.149756	0.377294	0	0		0	0	0.4			72	0.5	0
73	0.119805	0.396425	0	0		0	0	0.4			73	0.5	0
74	0.0958437	0.413894	0	0		0	0	0.4			74	0.5	0
75	0.0766749	0.429168	0	0		0	0	0.4			75	0.5	0
76	0.06134	0.442166	0	0		0	0	0.4			76	0.5	0
77	0.049072	0.453031	0	0		0	0	0.4			77	0.5	0
78	0.0392576	0.462004	0	0		0.142857	0.142857	0.4			78	0.5	1
79	0.100031	0.433637	0	0		0	0	0.4			79	0.5	0
80	0.0800244	0.440176	0	0		0	0	0.4			80	0.5	0
81	0.0640195	0.448101	0	0		0.142857	0.142857	0.4			81	0.5	1
82	0.118071	0.420342	0	0		0.142857	0.142857	0.4			82	0.5	1
83	0.157452	0.392877	0	0		0	0	0.4			83	0.5	0
84	0.125962	0.404236	0	0		0	0	0.4			84	0.5	0
85	0.100769	0.417349	0	0		0.285714	0.285714	0.4			85	0.5	2
86	0.209077	0.358827	0	0		0.285714	0.285714	0.4			86	0.5	2
87	0.280251	0.302052	0	0		0	0	0.4			87	0.5	0
88	0.2242	0.325181	0	0		0	0	0.4			88	0.5	0
89	0.17936	0.350269	0	0		0	0	0.4			89	0.5	0
90	0.143488	0.374289	0	0		0.285714	0.285714	0.4			90	0.5	2
91	0.237149	0.324447	0	0		0	0	0.4			91	0.5	0
92	0.18972	0.347238	0	0		0	0	0.4			92	0.5	0
93	0.151776	0.370399	0	0		0	0	0.4			93	0.5	0
94	0.121421	0.391884	0	0		0.285714	0.285714	0.4			94	0.5	2
95	0.222648	0.339418	0	0		0	0	0.4			95	0.5	0
96	0.178118	0.359121	0	0		0.142857	0.142857	0.4			96	0.5	1
97	0.2012	0.344135	0	0		0	0	0.4			97	0.5	0
98	0.16096	0.366241	0	0		0	0	0.4			98	0.5	0
99	0.128768	0.387552	0	0		0.285714	0.285714	0.4			99	0.5	2
100	0.227476	0.335349	0	0		0	0	0.4			100	0.5	0
													1
													0
													0
													0
													0
													0
